# Supplementary material
Source: Elsevier journal article supplement (https://hal.sorbonne-universite.fr/hal-01525834v1/file/mmc1.pdf)
Supplement: mmc1 [file mmc1.pdf]

**Table S.1.** Screening rates, prevalence ratios (PRs) and 95% confidence intervals (95%CI) for cervical cancer screening participation by the women's sociodemographic, socioeconomic and lifestyle characteristics, France 2010 (n = 3380).

| Characteristic                                 | n (%)       | Screening rate <sup>a</sup> | Univariate analysis                 | Multivariate analysis <sup>b</sup>  |                  |
|------------------------------------------------|-------------|-----------------------------|-------------------------------------|-------------------------------------|------------------|
|                                                |             |                             | PR (95%CI)                          | PR (95%CI)                          | P-value          |
| <b>Age</b>                                     |             |                             |                                     |                                     | 0.31             |
| [25–34]                                        | 778 (25.1)  | 90.0                        | Ref.                                | Ref.                                |                  |
| [35–44]                                        | 971 (27.9)  | 89.3                        | 0.99 (0.95–1.03)                    | 0.98 (0.95–1.02)                    |                  |
| [45–54]                                        | 810 (25.5)  | 88.5                        | 0.98 (0.94–1.02)                    | 0.98 (0.94–1.02)                    |                  |
| [55–65]                                        | 821 (21.6)  | 84.2                        | <b>0.94 (0.90–0.98)</b>             | 0.95 (0.90–1.00)                    |                  |
| <b>Living in a couple</b>                      |             |                             |                                     |                                     | <b>0.049</b>     |
| No                                             | 1226 (27.8) | 83.6                        | Ref.                                | Ref.                                |                  |
| Yes                                            | 2154 (72.2) | 89.9                        | <b>1.08 (1.04–1.12)</b>             | 1.04 (1.00–1.08)                    |                  |
| <b>Place of birth</b>                          |             |                             |                                     |                                     | 0.43             |
| France                                         | 3063 (88.7) | 88.8                        | Ref.                                | Ref.                                |                  |
| Europe                                         | 112 (3.3)   | 82.0                        | 0.92 (0.83–1.02)                    | 0.94 (0.85–1.04)                    |                  |
| Other                                          | 205 (7.9)   | 83.5                        | 0.94 (0.87–1.01)                    | 0.98 (0.90–1.06)                    |                  |
| <b>Risky alcohol use</b>                       |             |                             |                                     |                                     | <b>0.018</b>     |
| No                                             | 3138 (93.4) | 88.7                        | Ref.                                | Ref.                                |                  |
| Yes                                            | 242 (6.6)   | 80.2                        | <b>0.90 (0.84–0.97)</b>             | <b>0.92 (0.85–0.99)</b>             |                  |
| <b>Smoking status</b>                          |             |                             |                                     |                                     | 0.33             |
| Smoker                                         | 1121 (34.7) | 86.5                        | 0.98 (0.95–1.02)                    | 0.99 (0.95–1.02)                    |                  |
| Ex-smoker                                      | 980 (27.4)  | 90.5                        | 1.03 (0.99–1.06)                    | 1.01 (0.98–1.05)                    |                  |
| Never-smoker                                   | 1279 (37.9) | 88.0                        | Ref.                                | Ref.                                |                  |
| <b>Body Mass Index class</b>                   |             |                             |                                     |                                     | 0.28             |
| Underweight                                    | 197 (5.8)   | 88.0                        | 0.98 (0.92–1.04)                    | 1.00 (0.94–1.06)                    |                  |
| Normal weight                                  | 2103 (60.4) | 90.2                        | Ref.                                | Ref.                                |                  |
| Overweight                                     | 726 (22.3)  | 85.5                        | <b>0.95 (0.91–0.99)</b>             | 0.97 (0.93–1.01)                    |                  |
| Obesity                                        | 354 (11.5)  | 82.8                        | <b>0.92 (0.87–0.97)</b>             | 0.96 (0.91–1.02)                    |                  |
| <b>Level of education</b>                      |             |                             |                                     |                                     | 0.09             |
| <High school                                   | 1447 (52.8) | 85.0                        | Ref.                                | Ref.                                |                  |
| High school                                    | 650 (19.3)  | 92.3                        | <b>1.09 (1.05–1.12)</b>             | 1.03 (1.00–1.07)                    |                  |
| > High school                                  | 1283 (27.9) | 91.5                        | <b>1.08 (1.04–1.11)</b>             | 1.00 (0.96–1.04)                    |                  |
| <b>Occupational status</b>                     |             |                             |                                     |                                     | 0.23             |
| Working                                        | 2414 (69.2) | 90.6                        | Ref.                                | Ref.                                |                  |
| Unemployed                                     | 244 (8.2)   | 83.3                        | <b>0.92 (0.86–0.99)</b>             | 0.99 (0.92–1.07)                    |                  |
| Retired                                        | 357 (9.2)   | 83.0                        | <b>0.92 (0.87–0.97)</b>             | 0.96 (0.90–1.03)                    |                  |
| Inactive                                       | 365 (13.4)  | 81.9                        | <b>0.90 (0.86–0.96)</b>             | 0.95 (0.89–1.00)                    |                  |
| <b>Socio-occupational category</b>             |             |                             |                                     |                                     | <b>&lt;0.001</b> |
| Self-employed and entrepreneurs                | 115 (3.4)   | 95.5                        | 1.04 (0.99–1.09)                    | <b>1.11 (1.05–1.17)</b>             |                  |
| Higher level professionals and managers        | 522 (11.8)  | 91.9                        | Ref.                                | Ref.                                |                  |
| Lower level professionals                      | 1008 (26.0) | 90.6                        | 0.99 (0.95–1.02)                    | 0.98 (0.95–1.02)                    |                  |
| Clerical, sales and service                    | 1340 (43.7) | 88.4                        | <b>0.96 (0.93–1.00)<sup>c</sup></b> | 0.99 (0.95–1.03)                    |                  |
| Laborers and factory workers                   | 346 (13.4)  | 79.7                        | <b>0.87 (0.81–0.93)</b>             | <b>0.93 (0.87–1.00)<sup>c</sup></b> |                  |
| Others                                         | 49 (1.7)    | 71.8                        | <b>0.78 (0.63–0.97)</b>             | 0.86 (0.70–1.05)                    |                  |
| <b>Supplemental health insurance</b>           |             |                             |                                     |                                     | 0.38             |
| Free coverage for low income                   | 258 (9.6)   | 78.8                        | <b>0.88 (0.82–0.95)</b>             | 0.94 (0.87–1.03)                    |                  |
| None                                           | 205 (7.4)   | 84.3                        | 0.94 (0.88–1.01)                    | 0.98 (0.91–1.05)                    |                  |
| Private                                        | 2917 (82.9) | 89.6                        | Ref.                                | Ref.                                |                  |
| <b>Number of economic difficulties</b>         |             |                             |                                     |                                     | <b>0.036</b>     |
| 0                                              | 2459 (68.9) | 91.3                        | Ref.                                | Ref.                                |                  |
| 1                                              | 538 (17.7)  | 83.1                        | <b>0.91 (0.87–0.96)</b>             | <b>0.95 (0.91–0.99)</b>             |                  |
| ≥2                                             | 383 (13.4)  | 79.0                        | <b>0.87 (0.81–0.92)</b>             | 0.94 (0.88–1.01)                    |                  |
| <b>Had foregone care for financial reasons</b> |             |                             |                                     |                                     | 0.81             |
| Yes                                            | 428 (13.7)  | 83.5                        | <b>0.94 (0.89–0.99)</b>             | 0.99 (0.94–1.05)                    |                  |
| No                                             | 2952 (86.3) | 88.9                        | Ref.                                | Ref.                                |                  |
| <b>Gynecological follow-up</b>                 |             |                             |                                     |                                     | <b>&lt;0.001</b> |
| None                                           | 34 (1.4)    | 38.1                        | <b>0.42 (0.25–0.75)</b>             | <b>0.46 (0.28–0.75)</b>             |                  |
| By a gynecologist                              | 2811 (82.5) | 90.1                        | Ref.                                | Ref.                                |                  |
| By another physician                           | 535 (16.2)  | 82.4                        | <b>0.91 (0.87–0.96)</b>             | <b>0.93 (0.89–0.97)</b>             |                  |

<sup>a</sup> Screening rates and prevalence ratios weighted.

<sup>b</sup> PRs adjusted for all the variables listed in this table.

<sup>c</sup> 1 not included in the confidence interval.
